# Supplementary material
Source: HighWire-hosted journal article supplement (https://ijgc.bmj.com/highwire/filestream/20307/field_highwire_adjunct_files/3/ijgc-2021-002557supp004_data_supplement.pdf)
Supplement: ijgc-2021-002557supp004_data_supplement.pdf [file ijgc-2021-002557supp004_data_supplement.pdf]

# INTERNATIONAL JOURNAL OF GYNECOLOGICAL CANCER

## Not immune to inequity: minority under-representation in immunotherapy trials for breast and gynecologic cancers

KV Grette, AL White, EK Awad, JM Scalici, J Young-Pierce, RP Rocconi, NL Jones

53 Trials from 2008 to 2020

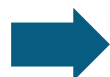

41 trials included race data  
(Breast=19, ovary=12, cervix=6, uterus=4)

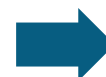

7201 total patients enrolled

Enrollment of black and Asian patients was significantly lower than expected for all cancer sites

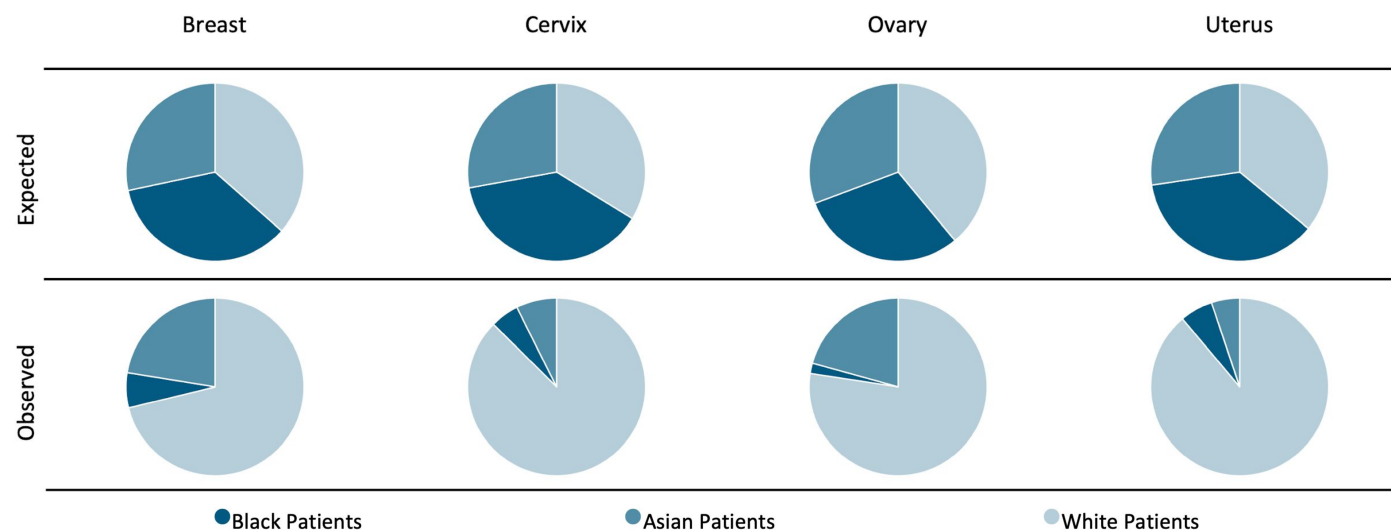

Equity in clinical trial enrollment must be achieved to address racial disparities in cancer outcomes

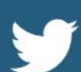

@IJGConline

Copyright © 2020 BMJ Publishing Group Ltd, International Gynecologic Cancer Society, & European Society of Gynaecological Oncology. All rights reserved.
